# Supplementary material
Source: Royal Society of Chemistry journal article supplement (doi:10.1039/d6fb00012f)
Supplement: d6fb00012f1.pdf [file d6fb00012f1.pdf]

## **Supplementary Information**

### **Standardization of Extraction Process Parameters and Solvent Reuse for Sustainable Extraction of Omega-3-Rich Flaxseed Oil**

Neha Naijo Areekal<sup>1</sup>, Abhishek J Gupta<sup>2</sup>, KSMS Raghavarao<sup>1</sup> and Anil B. Vir<sup>1\*</sup>,

<sup>1</sup>*Department of Chemical Engineering, Indian Institute of Technology, Tirupati-517619*

<sup>2</sup>*Marico Limited, Mumbai-400098*

\*Corresponding Author: [anilvir@iittp.ac.in](mailto:anilvir@iittp.ac.in)

---

#### **1. Statistical Analysis (ANOVA):**

Detailed ANOVA results for oil yield (%), solvent recovery (%), extraction efficiency, acid value (AV), and free fatty acid value (FFA) are included below.

##### **1.1 Effect of solvent type, extraction time, and solid-liquid ratio on flax oil yield**

**Table S1.** One-way ANOVA and Tukey's HSD test showing the effect of extraction time on oil yield for different solvents. Means values sharing the same lowercase letter are not significantly different ( $p > 0.05$ ).

| <b>Solvent</b>       | <b>ANOVA (F-value)</b> | <b>p-value</b> | <b>Time (h)</b> | <b>Mean oil yield (%)</b> | <b>Tukey group letter</b> |
|----------------------|------------------------|----------------|-----------------|---------------------------|---------------------------|
| <b>Hexane</b>        | 6.16                   | 0.03511        | 16              | 43.44 ± 1.85              | a                         |
|                      |                        |                | 12              | 40.25 ± 1.48              | ab                        |
|                      |                        |                | 8               | 39.31 ± 1.11              | b                         |
| <b>Ethanol</b>       | 774.39                 | < 0.001        | 16              | 38.22 ± 0.02              | a                         |
|                      |                        |                | 12              | 34.36 ± 0.62              | b                         |
|                      |                        |                | 8               | 26.14 ± 0.24              | c                         |
| <b>Ethyl acetate</b> | 23.17                  | 0.0015         | 16              | 40.25 ± 0.43              | a                         |
|                      |                        |                | 12              | 39.85 ± 0.02              | a                         |
|                      |                        |                | 8               | 37.07 ± 0.99              | b                         |

**Table S2:** Two-way ANOVA for the effect of solvent type and extraction time on oil yield

| Source                       | df | F-value | p-value |
|------------------------------|----|---------|---------|
| Extraction time              | 2  | 101.87  | < 0.001 |
| Solvent type                 | 2  | 171.05  | < 0.001 |
| Interaction (time × solvent) | 4  | 22.13   | < 0.001 |

**Table S3.** One-way ANOVA and Tukey's HSD test showing the effect of solid-liquid ratio on oil yield for different solvents. Means values sharing the same lowercase letter are not significantly different ( $p > 0.05$ ).

| Solvent              | ANOVA (F-value) | p-value | S-L Ratio | Mean oil yield (%) | Tukey group letter |
|----------------------|-----------------|---------|-----------|--------------------|--------------------|
| <b>Hexane</b>        | 81.93           | < 0.001 | 1:2.5     | 21.79 ± 0.53       | c                  |
|                      |                 |         | 1:5       | 36.19 ± 2.76       | b                  |
|                      |                 |         | 1:10      | 40.48 ± 1.3        | ab                 |
|                      |                 |         | 1:15      | 45.56 ± 2.39       | a                  |
| <b>Ethanol</b>       | 222.83          | < 0.001 | 1:2.5     | 19.12 ± 1.73       | d                  |
|                      |                 |         | 1:5       | 33.97 ± 0.18       | c                  |
|                      |                 |         | 1:10      | 37.06 ± 0.35       | b                  |
|                      |                 |         | 1:15      | 41.36 ± 1.37       | a                  |
| <b>Ethyl acetate</b> | 187.51          | < 0.001 | 1:2.5     | 20.72 ± 1.1        | d                  |
|                      |                 |         | 1:5       | 34.65 ± 0.26       | c                  |
|                      |                 |         | 1:10      | 38.29 ± 1.65       | b                  |
|                      |                 |         | 1:15      | 43.7 ± 1.47        | a                  |

**Table S4:** Two-way ANOVA for the effect of solvent type and solid-liquid ratio on oil yield

| Source                            | df | F-value | p-value |
|-----------------------------------|----|---------|---------|
| S-L ratio                         | 3  | 398.99  | < 0.001 |
| Solvent type                      | 2  | 13.31   | < 0.001 |
| Interaction (S-L ratio × solvent) | 6  | 0.3329  | 0.92    |

**Table S5.** One-way ANOVA and Tukey's HSD test showing the effect of solid-liquid ratio on the extraction efficiency (%) for different solvents. Means values sharing the same lowercase letter are not significantly different ( $p > 0.05$ ).

| Solvent              | ANOVA (F-value) | p-value | S-L Ratio | Mean oil yield (%) | Tukey group letter |
|----------------------|-----------------|---------|-----------|--------------------|--------------------|
| <b>Hexane</b>        | 84.93           | < 0.001 | 1:2.5     | 75.42 ± 1.27       | d                  |
|                      |                 |         | 1:5       | 81.64 ± 2.56       | c                  |
|                      |                 |         | 1:10      | 89.44 ± 2.55       | b                  |
|                      |                 |         | 1:15      | 99.47 ± 0.74       | a                  |
| <b>Ethanol</b>       | 36.70           | < 0.001 | 1:2.5     | 60.96 ± 0.74       | c                  |
|                      |                 |         | 1:5       | 74.94 ± 2.2        | b                  |
|                      |                 |         | 1:10      | 81.84 ± 3.86       | b                  |
|                      |                 |         | 1:15      | 91.95 ± 5.92       | a                  |
| <b>Ethyl acetate</b> | 88.77           | < 0.001 | 1:2.5     | 66.87 ± 1.46       | d                  |
|                      |                 |         | 1:5       | 76.2 ± 0.51        | c                  |
|                      |                 |         | 1:10      | 86.8 ± 3.84        | b                  |
|                      |                 |         | 1:15      | 96.93 ± 2.4        | a                  |

**Table S6:** Two-way ANOVA for the effect of solvent type and solid-liquid ratio on extraction efficiency (%)

| Source                            | df | F-value | p-value |
|-----------------------------------|----|---------|---------|
| S-L ratio                         | 3  | 168.68  | < 0.001 |
| Solvent type                      | 2  | 31.72   | < 0.001 |
| Interaction (S-L ratio × solvent) | 6  | 1.63    | 0.182   |

## 1.2 Solvent recycling study

**Table S7:** Solvent recovery and oil yield across ten Soxhlet extraction cycles. Values are expressed as mean (n = 3). Means sharing the same letter within each column are not significantly different (p > 0.05), as determined by one-way ANOVA followed by Tukey's HSD test.

| Extraction Cycle | Solvent recovery (%) | Tukey group letter | Oil yield (%) | Tukey group letter |
|------------------|----------------------|--------------------|---------------|--------------------|
| 1                | 68 ± 1.5             | c                  | 42.5 ± 0.35   | a                  |
| 2                | 76 ± 1               | ab                 | 40.5 ± 0.35   | b                  |
| 3                | 71 ± 2               | c                  | 42.5 ± 0.35   | a                  |
| 4                | 75 ± 1               | b                  | 40.5 ± 0.7    | b                  |
| 5                | 79 ± 1               | a                  | 42.5 ± 0.35   | a                  |
| 6                | 71 ± 2               | c                  | 40.5 ± 0.7    | b                  |
| 7                | 71 ± 1               | c                  | 42.5 ± 1.06   | a                  |
| 8                | 71 ± 1               | c                  | 42.5 ± 0.35   | a                  |
| 9                | 71 ± 1               | c                  | 42.5 ± 0.35   | a                  |
| 10               | 71 ± 1               | c                  | 42.5 ± 0.35   | a                  |

During the solvent recycling (hexane) study, the oil cake mass was recorded for each extraction cycle. For every 10 g of flaxseed processed, approximately 5–6 g of residual oil cake was obtained. Detailed oil cake data across extraction cycles are presented in **Figure S1**.

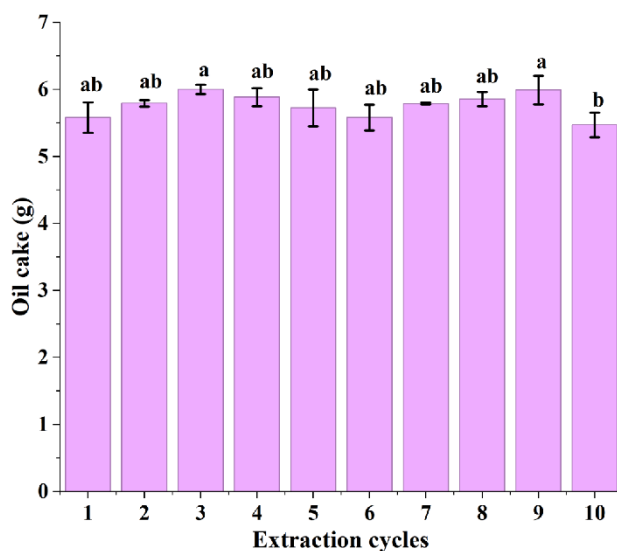

**Figure S1.** Amount of oil cake obtained over ten consecutive extraction cycles. Values are expressed as mean ± standard deviation (n = 3). Different lowercase letters indicate statistically significant differences (p < 0.05) among extraction cycles, as determined by one-way ANOVA followed by Tukey's post hoc test.

## 2. Gas Chromatography (GC) analysis:

The flax oil extracted and the hexane recovered at the end of each Soxhlet extraction cycle were analysed by GC-FID to assess the fatty acid composition and the presence of impurities in the recovered solvent. The protocol described in the GC-FID analysis in **Section 2.4** was used to analyse both oil and FAME standards. The retention time and corresponding area (%) of fatty acids present in the FAME standard are presented in **Table S8**.

The chromatograms of the oil obtained showed the presence of fatty acids such as palmitic acid, palmitoleic acid, cis-heptadecanoic acid, stearic acid, oleic acid, trans-9-elaidic acid, linoleic acid, linolenic acid, and gamma-linolenic acid. The fatty acids were identified by comparing the area percentages and retention times of fatty acids in the oil chromatogram (**Table S9**) with those in the FAME standard (**Table S8**).

**Table S8:** GC-FID analysis of fatty acid methyl ester (FAME) standards showing retention time and area percentage. Values are expressed as mean  $\pm$  standard deviation (n = 3).

| S. No | Fatty acid                        | Short name       | Area (mean $\pm$ SD) | Area (%)        | Retention time (min) |
|-------|-----------------------------------|------------------|----------------------|-----------------|----------------------|
| 1     | Butyric acid                      | C4:0             | 1492265.7 $\pm$ 2.14 | 3.22 $\pm$ 0.00 | 4.08 $\pm$ 0.00      |
| 2     | Caproic acid                      | C6:0             | 1680481.6 $\pm$ 0.53 | 3.63 $\pm$ 0.00 | 8.10 $\pm$ 0.00      |
| 3     | Caprylic acid                     | C8:0             | 1800165.0 $\pm$ 2.05 | 3.89 $\pm$ 0.00 | 12.38 $\pm$ 0.00     |
| 4     | Capric acid                       | C10:0            | 921792.12 $\pm$ 0.90 | 1.99 $\pm$ 0.00 | 14.60 $\pm$ 0.00     |
| 5     | Undecanoic acid                   | C11:0            | 1888421.9 $\pm$ 0.84 | 4.08 $\pm$ 0.00 | 16.80 $\pm$ 0.00     |
| 6     | Lauric acid                       | C12:0            | 960990.2 $\pm$ 0.56  | 2.07 $\pm$ 0.00 | 18.46 $\pm$ 0.00     |
| 7     | Triundecanoic acid                | C13:0            | 1982009.0 $\pm$ 1.14 | 4.28 $\pm$ 0.00 | 21.01 $\pm$ 0.57     |
| 8     | Myristic acid                     | C14:0            | 955859.45 $\pm$ 0.60 | 2.06 $\pm$ 0.00 | 21.81 $\pm$ 0.00     |
| 9     | Myristoleic acid                  | C14:1            | 994407.38 $\pm$ 0.98 | 2.15 $\pm$ 0.00 | 22.99 $\pm$ 0.01     |
| 10    | Pentadecanoic acid                | C15:0            | 969763.34 $\pm$ 3.79 | 2.09 $\pm$ 00   | 23.78 $\pm$ 0.00     |
| 11    | <i>cis</i> -10-Pentadecenoic acid | C15:1            | 2957297.5 $\pm$ 1.50 | 6.39 $\pm$ 0.00 | 24..91 $\pm$ 0.00    |
| 12    | Palmitic acid                     | C16:0            | 991314.42 $\pm$ 0.56 | 2.14 $\pm$ 0.00 | 25.45 $\pm$ 0.00     |
| 13    | Palmitoleic acid                  | C16:1            | 100854.18 $\pm$ 0.62 | 0.21 $\pm$ 0.00 | 26.74 $\pm$ 0.00     |
| 14    | Heptadecanoic acid                | C17:0            | 998343.5 $\pm$ 1.17  | 2.15 $\pm$ 0.00 | 27.27 $\pm$ 0.00     |
| 15    | <i>cis</i> -10-Heptadecanoic acid | C17:1            | 2027160.4 $\pm$ 2.24 | 4.38 $\pm$ 0.00 | 28.51 $\pm$ 0.01     |
| 16    | Stearic acid                      | C18:0            | 3064543.3 $\pm$ 1.60 | 6.62 $\pm$ 0.00 | 28.93 $\pm$ 0.00     |
| 17    | Elaidic acid                      | C18:1 trans (n9) | 2056423.7 $\pm$ 1.24 | 4.44 $\pm$ 0.00 | 29.67 $\pm$ 0.00     |
| 18    | Oleic acid                        | C18:1 cis (n9)   |                      |                 |                      |

|    |                                                  |                  |                   |             |              |
|----|--------------------------------------------------|------------------|-------------------|-------------|--------------|
| 19 | Linolelaidic acid                                | C18:2 trans (n6) | 1048160.2 ± 1.10  | 2.26±0.00   | 30.32 ± 0.02 |
| 20 | Linoleic acid                                    | C18:2 cis (n6)   |                   |             |              |
| 21 | Gamma-Linolenic acid                             | C 18:3n6         | 1007678.4 ± 2.21  | 2.17 ± 0.00 | 30.93 ± 0.00 |
| 22 | Alpha-linolenic acid                             | C18:3n3          | 2063120.5 ± 1.01  | 4.46 ± 0.00 | 32.08 ± 0.00 |
| 23 | Arachidic acid                                   | C20:0            | 1033274.4 ± 0.82  | 2.23 ± 0.00 | 32.57 ± 0.00 |
| 24 | <i>cis</i> -11-Eicosenoic acid                   | C20:1(n9)        | 1003200.6 ± 0.54  | 2.17 ± 0.00 | 33.72 ± 0.01 |
| 25 | <i>cis</i> -11,14-Eicosadienoic acid             | C20:2            | 10271434.9±0.93   | 2.22±0.00   | 34.46 ± 0.00 |
| 26 | <i>cis</i> -8,11,14-Eicosatrienoic acid          | C20:3n6          | 1003002.5±0.50    | 2.16±0.00   | 34.46 ± 0.00 |
| 27 | Heneicosanoic acid                               | C21:0            |                   |             |              |
| 28 | <i>cis</i> -11,14,17-Eicosatrienoic acid         | C20:3n3          | 992280.51 ± 0.61  | 2.14 ± 0.00 | 35.13 ± 0.01 |
| 29 | Arachidonic acid                                 | C20:4n6          | 995168.33 ± 0.58  | 2.15 ± 0.00 | 35.46 ± 0.01 |
| 30 | <i>cis</i> -5,8,11,14,17-Eicosapentaenoic acid   | C20:5n3          | 30753864.0 ± 2.12 | 6.65 ± 0.00 | 37.1 ± 0.00  |
| 31 | Behenic acid                                     | C22:0            | 1009643 8 ± 0.84  | 2.18 ± 0.00 | 37.89 ± 0.01 |
| 32 | Erucic acid                                      | C22:1n9          | 1033815.0 ± 1.10  | 2.23 ± 0.00 | 39.66 ± 0.01 |
| 33 | <i>cis</i> -13,16-Docosadienoic acid             | C22:2            | 1065267.7 ± 0.65  | 2.30 ± 0.00 | 40.53± 0.00  |
| 34 | Tricosanoic acid                                 | C23.0            | 2105577.2 ± 0.40  | 4.55 ± 0.00 | 44.87 ± 0.01 |
| 35 | Lignoceric acid                                  | C24:0            | 1053386.8 ± 0.81  | 2.27 ± 0.00 | 46.19 ± 0.00 |
| 36 | Nervonic acid                                    | C24:1            | 868947.26 ± 0.67  | 1.87 ± 0.00 | 46.64 ± 0.02 |
| 37 | <i>cis</i> -4,7,10,13,16,19-Docosahexaenoic acid | C22:6(n3) (DHA)  |                   |             |              |

**Table S9:** Retention time (RT) and area percentage of major fatty acids in flax oil across Soxhlet extraction cycles. Values are presented as mean  $\pm$  standard deviation (n = 3).

| Cycle     | Parameter       | PA                | PAM              | SA               | CHA              | OA               | LA                | LAA              | GLA              | TEA              |
|-----------|-----------------|-------------------|------------------|------------------|------------------|------------------|-------------------|------------------|------------------|------------------|
| <b>1</b>  | <b>RT (min)</b> | 25.64 $\pm$ 0.01  | –                | 29.02 $\pm$ 0.01 | 28.95 $\pm$ 0.56 | 29.18 $\pm$ 0.58 | 29.88 $\pm$ 0.00  | 31.12 $\pm$ 0.00 | –                | –                |
|           | <b>Area (%)</b> | 6.20 $\pm$ 0.01   | –                | 22.63 $\pm$ 0.03 | 6.40 $\pm$ 0.26  | 0.72 $\pm$ 0.01  | 14.54 $\pm$ 0.02  | 48.76 $\pm$ 0.20 | –                | –                |
| <b>2</b>  | <b>RT (min)</b> | 25.02 $\pm$ 0.00  | –                | 29.09 $\pm$ 0.00 | 28.65 $\pm$ 0.01 | 29.15 $\pm$ 0.01 | 29.88 $\pm$ 0.00  | 31.12 $\pm$ 0.00 | 32.21 $\pm$ 0.01 | –                |
|           | <b>Area (%)</b> | 7.42 $\pm$ 0.05   | –                | 24.24 $\pm$ 0.45 | 7.12 $\pm$ 0.41  | 0.70 $\pm$ 0.01  | 14.25 $\pm$ 0.02  | 44.36 $\pm$ 0.01 | 0.53 $\pm$ 0.01  | –                |
| <b>3</b>  | <b>RT (min)</b> | 25.01 $\pm$ 0.00  | –                | 29.06 $\pm$ 0.00 | 28.62 $\pm$ 0.01 | 29.14 $\pm$ 0.01 | 29.86 $\pm$ 0.00  | 31.07 $\pm$ 0.05 | –                | –                |
|           | <b>Area (%)</b> | 6.2 $\pm$ 0.00    | –                | 22.82 $\pm$ 0.13 | 6.19 $\pm$ 0.00  | 0.61 $\pm$ 0.01  | 13.41 $\pm$ 0.01  | 51.2 $\pm$ 0.01  | –                | –                |
| <b>4</b>  | <b>RT (min)</b> | 25.01 $\pm$ 0.00  | –                | 29.05 $\pm$ 0.00 | 28.61 $\pm$ 0.01 | 29.12 $\pm$ 0.02 | 29.86 $\pm$ 0.00  | 31.08 $\pm$ 0.00 | –                | –                |
|           | <b>Area (%)</b> | 6.15 $\pm$ 0.04   | –                | 21.53 $\pm$ 0.09 | 6.43 $\pm$ 0.02  | 1.16 $\pm$ 0.35  | 13.39 $\pm$ 0.09  | 51.10 $\pm$ 0.53 | –                | –                |
| <b>5</b>  | <b>RT (min)</b> | 25.64 $\pm$ 0.01  | 25.63 $\pm$ 0.01 | 29.04 $\pm$ 0.02 | 28.63 $\pm$ 0.01 | 29.15 $\pm$ 0.00 | 29.88 $\pm$ 0.001 | 31.12 $\pm$ 0.00 | –                | 29.67 $\pm$ 0.00 |
|           | <b>Area (%)</b> | 4.70 $\pm$ 0.02   | 4.66 $\pm$ 0.06  | 21.85 $\pm$ 0.10 | 6.72 $\pm$ 0.01  | 0.70 $\pm$ 0.00  | 12.48 $\pm$ 0.03  | 43.89 $\pm$ 0.21 | –                | 2.53 $\pm$ 0.01  |
| <b>6</b>  | <b>RT (min)</b> | 25.01 $\pm$ 0.001 | –                | 29.04 $\pm$ 0.02 | 28.63 $\pm$ 0.01 | 29.14 $\pm$ 0.01 | 29.87 $\pm$ 0.00  | 31.10 $\pm$ 0.01 | –                | –                |
|           | <b>Area (%)</b> | 6.23 $\pm$ 0.002  | –                | 23.3 $\pm$ 0.26  | 7.3 $\pm$ 0.01   | 0.70 $\pm$ 0.05  | 13.54 $\pm$ 0.02  | 48.3 $\pm$ 0.13  | –                | –                |
| <b>7</b>  | <b>RT (min)</b> | 25.01 $\pm$ 0.00  | –                | 29.08 $\pm$ 0.01 | 28.95 $\pm$ 0.56 | 29.13 $\pm$ 0.02 | 29.87 $\pm$ 0.01  | 31.12 $\pm$ 0.00 | –                | –                |
|           | <b>Area (%)</b> | 6.05 $\pm$ 0.03   | –                | 22.04 $\pm$ 0.04 | 6.68 $\pm$ 0.20  | 0.64 $\pm$ 0.01  | 13.35 $\pm$ 0.13  | 51.18 $\pm$ 0.07 | –                | –                |
| <b>8</b>  | <b>RT (min)</b> | 25.03 $\pm$ 0.00  | –                | 29.10 $\pm$ 0.00 | 28.65 $\pm$ 0.01 | –                | 29.87 $\pm$ 0.01  | 31.16 $\pm$ 0.01 | 32.21 $\pm$ 0.01 | –                |
|           | <b>Area (%)</b> | 6.0 $\pm$ 0.01    | –                | 22.73 $\pm$ 0.27 | 6.37 $\pm$ 0.01  | –                | 13.48 $\pm$ 0.49  | 50.36 $\pm$ 0.14 | 0.46 $\pm$ 0.01  | –                |
| <b>9</b>  | <b>RT (min)</b> | 25.01 $\pm$ 0.00  | –                | 29.07 $\pm$ 0.05 | 28.63 $\pm$ 0.01 | 29.17 $\pm$ 0.01 | 29.89 $\pm$ 0.00  | 31.16 $\pm$ 0.00 | –                | –                |
|           | <b>Area (%)</b> | 6.2 $\pm$ 0.00    | –                | 22.87 $\pm$ 0.06 | 6.30 $\pm$ 0.03  | 0.64 $\pm$ 0.02  | 13.56 $\pm$ 0.01  | 50.41 $\pm$ 0.17 | –                | –                |
| <b>10</b> | <b>RT (min)</b> | 25.02 $\pm$ 0.00  | –                | 28.72 $\pm$ 0.11 | 28.63 $\pm$ 0.01 | 29.13 $\pm$ 0.02 | 29.871 $\pm$ 0.01 | 31.12 $\pm$ 0.00 | –                | –                |
|           | <b>Area (%)</b> | 6.15 $\pm$ 0.04   | –                | 22.65 $\pm$ 0.02 | 6.43 $\pm$ 0.01  | 0.67 $\pm$ 0.00  | 13.57 $\pm$ 0.01  | 50.29 $\pm$ 0.11 | –                | –                |

**PA:** Palmitic acid, **LA:** Linoleic acid, **PAM:** Palmitoleic acid, **LAA:** Linolenic acid, **SA:** Stearic acid, **GLA:** Gamma linolenic acid, **CHA:** Cis Heptadecanoic acid, **TEA:** Trans-9-Elaidic acid, **OA:** Oleic acid

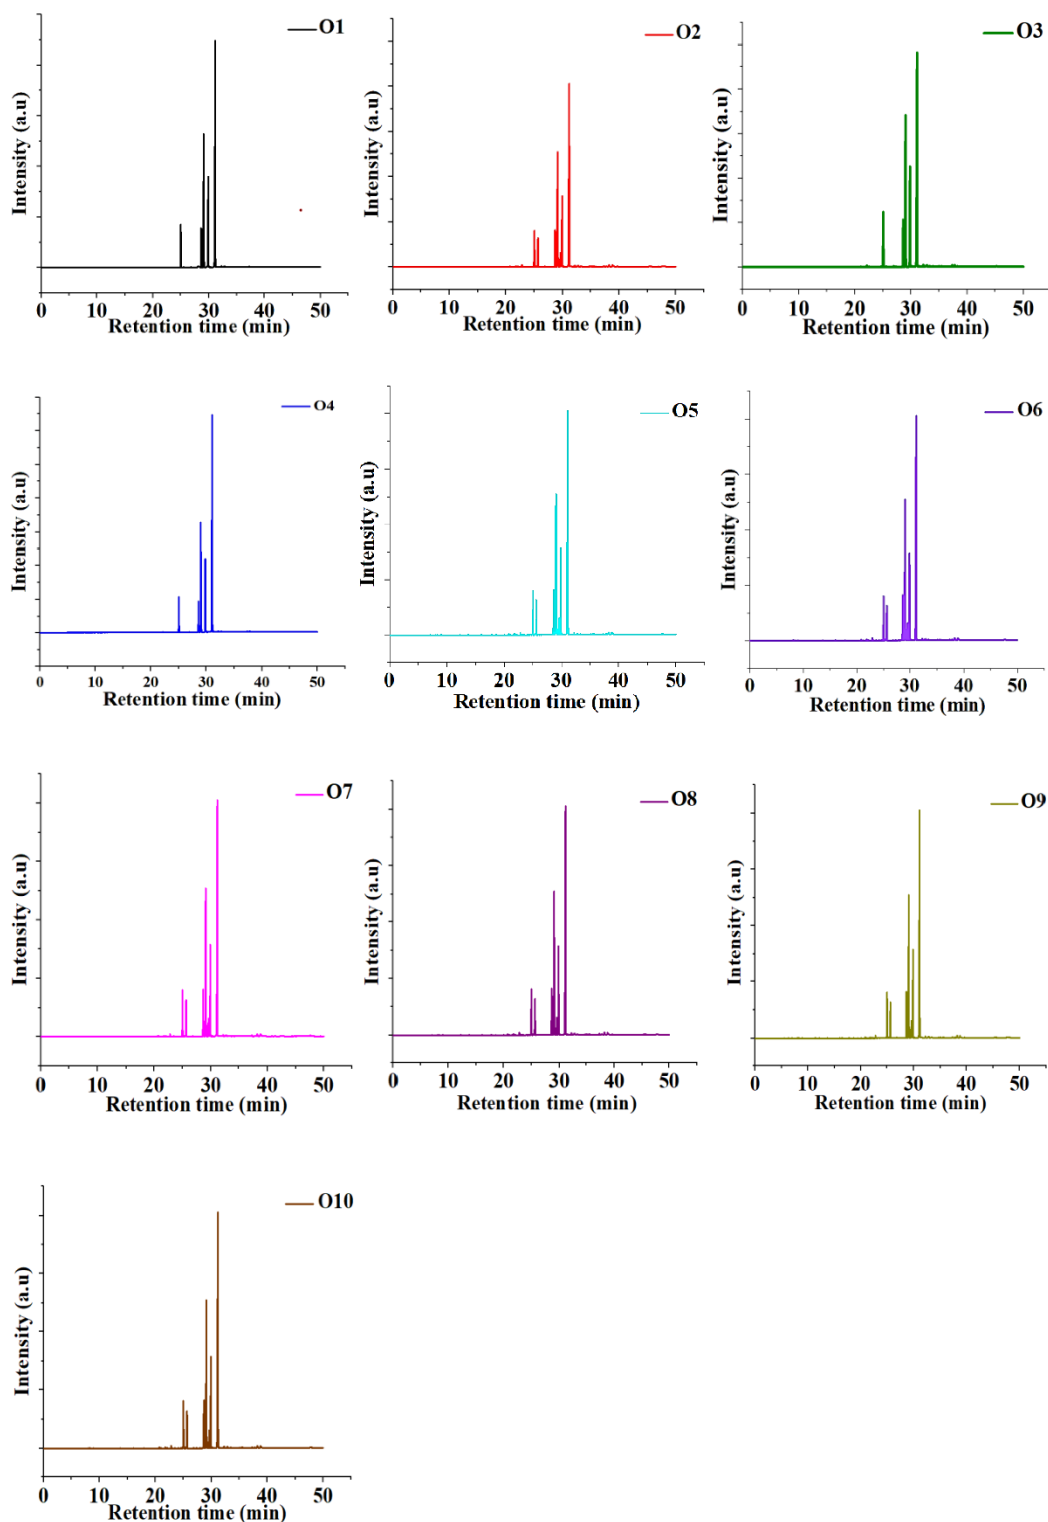

**Figure S2.** GC-FID chromatograms for oil extracted from ten extraction cycles using hexane  
 Chromatograms of solvent (hexane) recovered from different Soxhlet extraction cycles were obtained for confirming the quality of hexane and if any degradation of impurities present. The chromatogram of pure hexane showed a peak at 2.09 min with an area percentage of  $99.64 \pm 0.02\%$ . The GC-FID analysis of hexane recovered from the 10 extraction cycles showed peaks at 2.09 min with  $99.15 \pm 0.01$

to  $99.76 \pm 0.02\%$  area percentage with no additional peaks (**Figure S3**). This confirms that the recovered hexane after the extraction cycles did not degrade, and hence that the solvent was free of impurities. The resulting chromatograms are presented in **Figure S3**.

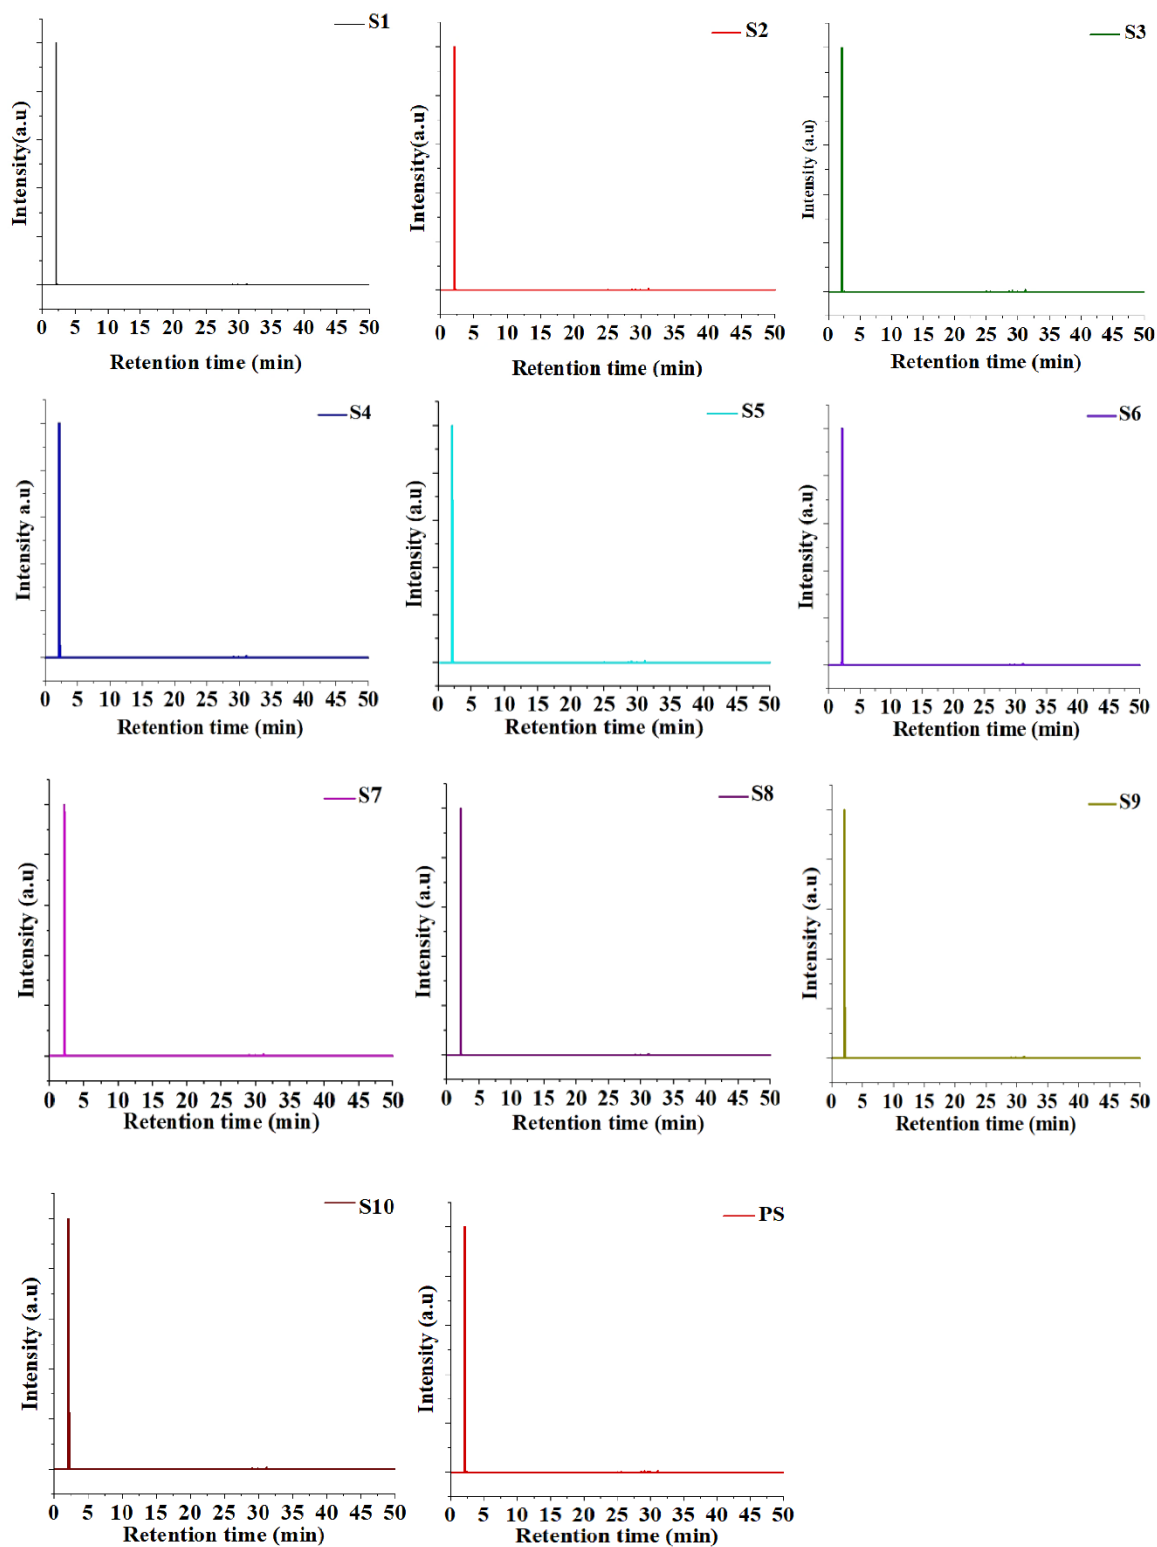

**Figure S3.** GC-FID chromatograms for recovered hexane from ten extraction cycles (S: hexane, PS: Pure hexane)

### 3. FT-IR Analysis

The FT-IR spectra of flax oil showed characteristic absorption bands at 3012, 2925, 2854, 1743, 1461, 1376, 1238, 1162, 1099 and 723  $\text{cm}^{-1}$ , indicating functional groups as mentioned in **Table S10**. These bands represent =C-H Stretching(olefinic), asymmetric and symmetric stretching of -CH<sub>2</sub> groups, C=O stretching, CH<sub>2</sub> bending, CH<sub>3</sub> symmetric bending, C-O-C and C-O stretching vibrations. The FT-IR spectra of the oils extracted from each Soxhlet extraction cycle remained consistent with respect to the peak positions and functional groups observed (**Figure S4**). This confirms that the chemical structure of the oil did not change during repeated extraction cycles.

**Table S10:** Functional groups with type of vibrations for FT-IR spectra of flax oil

| Band frequency ( $\text{cm}^{-1}$ ) | Functional group                | Type of vibrations                                                 |
|-------------------------------------|---------------------------------|--------------------------------------------------------------------|
| 3012                                | Olefinic                        | =C-H Stretching                                                    |
| 2925                                | Aliphatic                       | asymmetrical stretching of the methylene group (-CH <sub>2</sub> ) |
| 2854                                | Aliphatic                       | symmetrical stretching of the methylene group (-CH <sub>2</sub> )  |
| 1743                                | Ester                           | C=O stretching (carbonyl group)                                    |
| 1461                                | Alkane (-CH <sub>2</sub> )      | Bending vibration of CH <sub>2</sub>                               |
| 1376                                | Alkyl group (-CH <sub>3</sub> ) | Symmetric bending of CH <sub>3</sub> group                         |
| 1238                                | Ester/Ether                     | C-O-C stretching vibration                                         |
| 1162                                | Ester                           | C-O stretching (ester linkage)                                     |
| 1099                                | Ester/Ether                     | C-O stretching                                                     |
| 723                                 | Alkane                          | C-H rocking bond vibrations                                        |

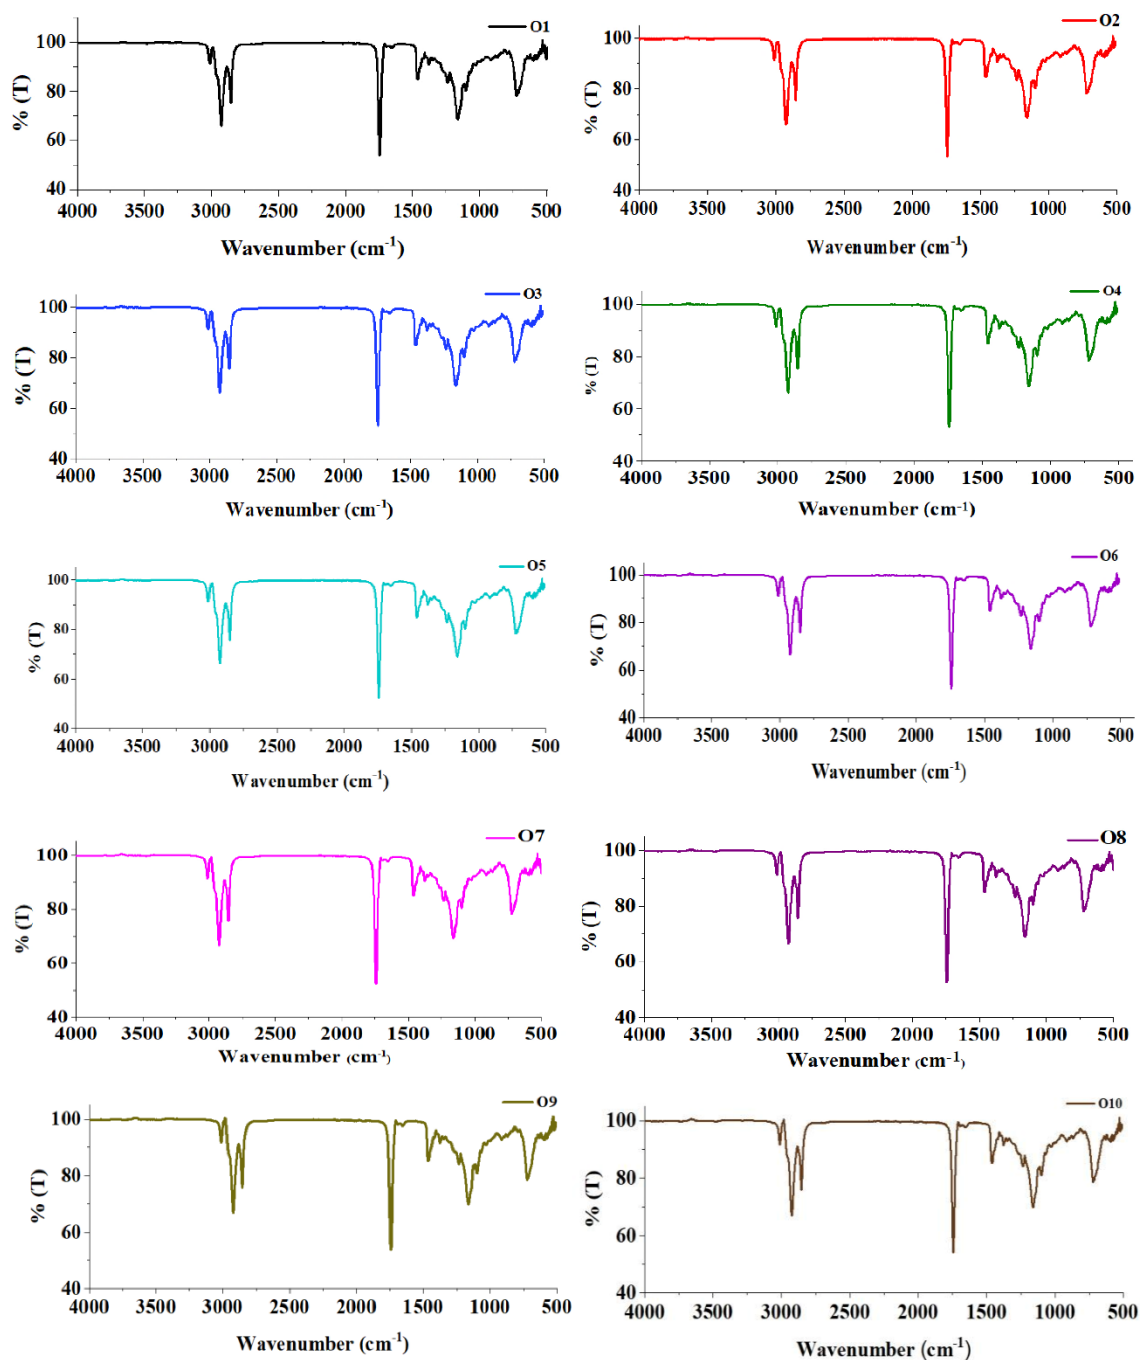

**Figure S4.** FT-IR spectra of flax oil extracted using hexane as a solvent across ten Soxhlet extraction cycles

The FT-IR spectra of the recovered hexane showed characteristic peaks at 2960, 2923, 2854, 1461, 1377, and 724  $\text{cm}^{-1}$ . The spectra remained largely unchanged across different extraction cycles, which indicates that hexane retained the chemical structure. As shown in Figure S5, minor variations in the peak intensity were observed from the fourth extraction cycle onwards. This change in intensity may be attributed to the presence of trace co-extracted compounds. Also, no additional peaks corresponding to new functional groups were detected, confirming the absence of significant chemical changes in the recovered hexane. Although minor changes in peak intensity were observed in the recovered hexane,

these changes did not affect the solvent's performance in terms of oil yield and oil quality, as indicated by consistent results for oil yield and the oil's physicochemical properties across successive extraction cycles presented in the main manuscript.

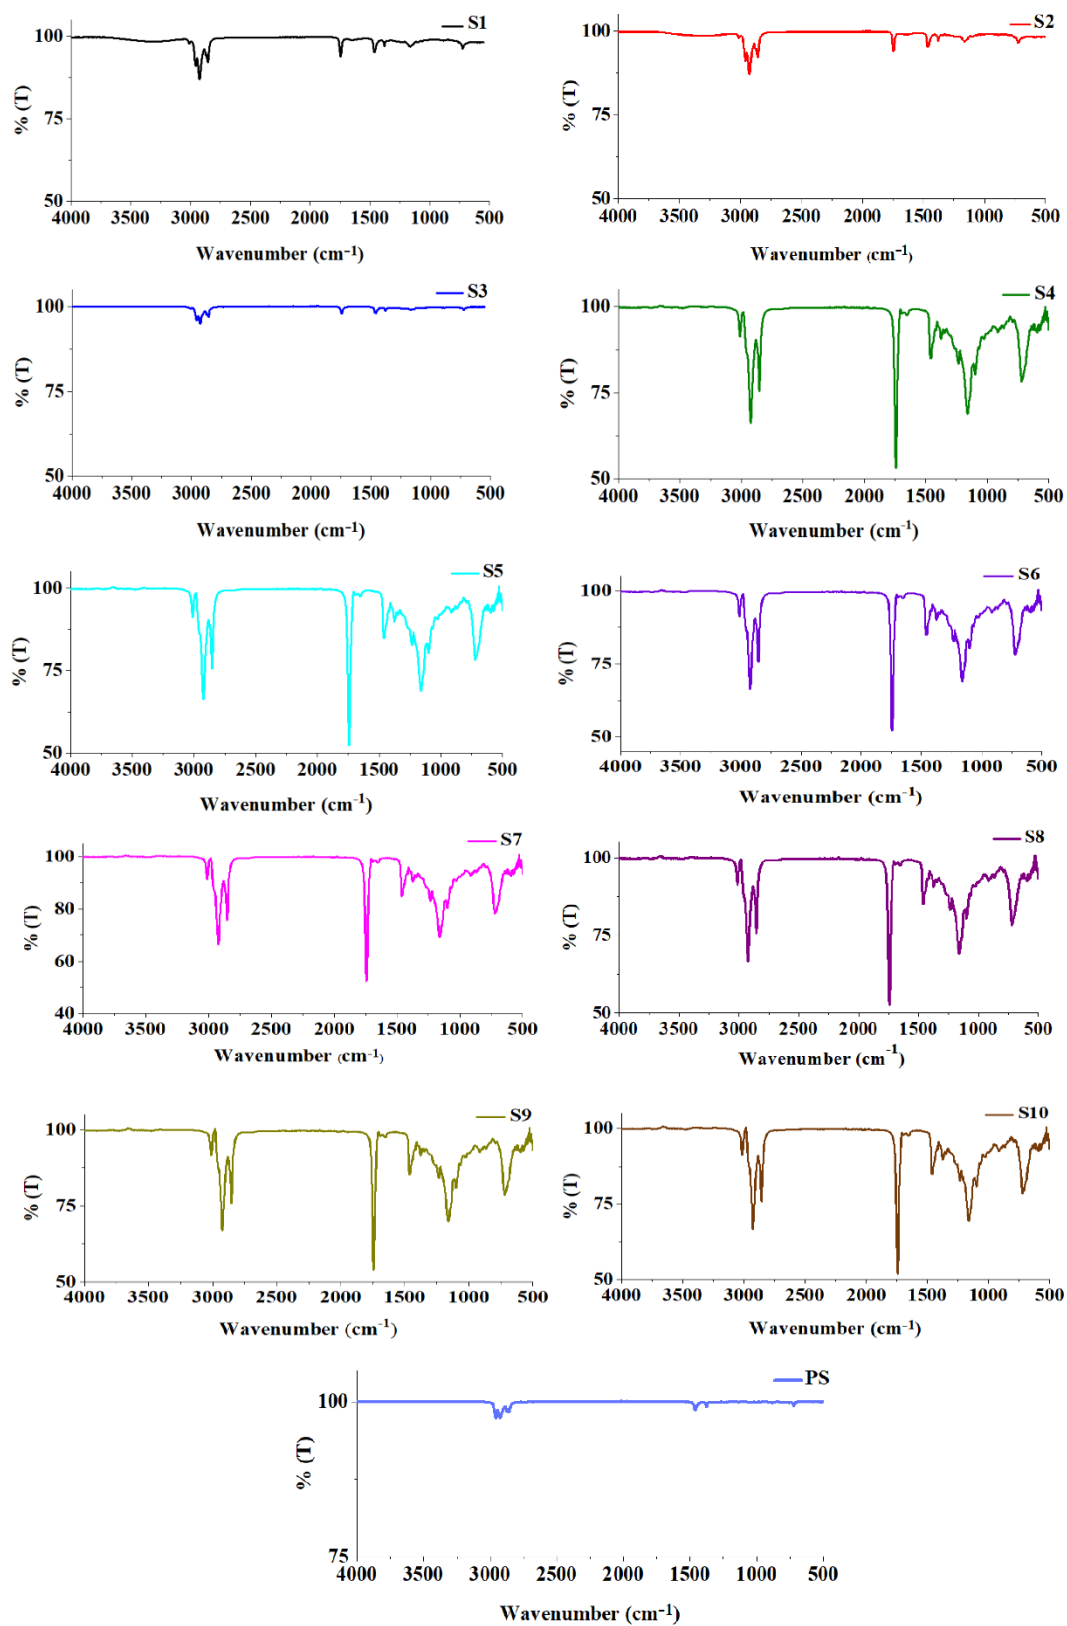

**Figure S5.** FT-IR spectra of recovered hexane from 10 successive Soxhlet extraction cycles (S: hexane, PS: Pure hexane).
